# Supplementary material for: Contribution of Testing Strategies and Contact Tracing towards COVID-19 Outbreaks Control: A Mathematical Modeling Study
Source: MDPI journal article supplement (doi:10.3390/tropicalmed7110376), 2022-11-14
Supplement: s1 [file s1]

## Supplementary Materials

# Contribution of testing strategies and contact tracing towards COVID-19 outbreaks control: A mathematical modeling study

Shu-Chen Kuo <sup>1,†</sup>, Byron Fan <sup>2,†</sup>, Hongye Zhu <sup>3,†</sup>, Meng-Hsuan Wu <sup>4,†</sup>, Fang-Jing Lee <sup>4,†</sup>, Yu-Chieh Cheng <sup>4</sup>, Hsiao-Yu Wu <sup>4</sup>, Ya-Ting Hsu <sup>4</sup>, Chao A. Hsiung <sup>4</sup>, Shioh-Ing Wu <sup>4</sup>, Wei J. Chen <sup>5,6</sup>, Hung-Yi Chiou <sup>4,7,8</sup>, Huey-Kang Sytwu <sup>1</sup> and Hsiao-Hui Tsou <sup>4,9,\*</sup>

<sup>1</sup> National Institute of Infectious Diseases and Vaccinology, National Health Research Institutes, Zhunan 35053, Taiwan

<sup>2</sup> Department of Applied Mathematics, Brown University, Providence, RI 02912, USA

<sup>3</sup> Department of Public Health, College of Public Health, National Taiwan University, Taipei 10617, Taiwan

<sup>4</sup> Institute of Population Health Sciences, National Health Research Institutes, Zhunan 35053, Taiwan

<sup>5</sup> Center for Neuropsychiatric Research, National Health Research Institutes, Zhunan 35053, Taiwan

<sup>6</sup> Institute of Epidemiology and Preventive Medicine, College of Public Health, National Taiwan University, Taipei 10617, Taiwan

<sup>7</sup> School of Public Health, College of Public Health, Taipei Medical University, Taipei 11031, Taiwan

<sup>8</sup> Master's Program in Applied Epidemiology, College of Public Health, Taipei Medical University, Taipei 11031, Taiwan

<sup>9</sup> Graduate Institute of Biostatistics, College of Public Health, China Medical University, Taichung 40402, Taiwan

\* Correspondence: tsouhh@nhri.edu.tw; Tel.: +886-37-206-166 (ext. 36181)

† These authors contributed equally to this research.

## Model

A stochastic transmission model was constructed to assess the feasibility of controlling the COVID-19 outbreak through contact tracing and case isolation. We assessed the effectiveness of universal testing under the same model assumptions.

### Weibull

For each COVID-19 patient, we assumed that the incubation period was a Weibull random variable  $X$ . The probability density function of the Weibull distribution is as follows:

$$f(x) = \begin{cases} \frac{k}{\lambda} \left(\frac{x}{\lambda}\right)^{k-1} e^{-\left(\frac{x}{\lambda}\right)^k} & x \geq 0 \\ 0 & x < 0 \end{cases}$$

where  $k$  is the shape parameter and  $\lambda$  is a scale parameter. The distribution is demonstrated in Figure S1a,b.

We assumed the delay from symptom onset to isolation also follows a Weibull distribution with mean and standard deviation estimated by Liu et al. [1] and Tsou et al. [2] (see Table 1 & Figure S1d).

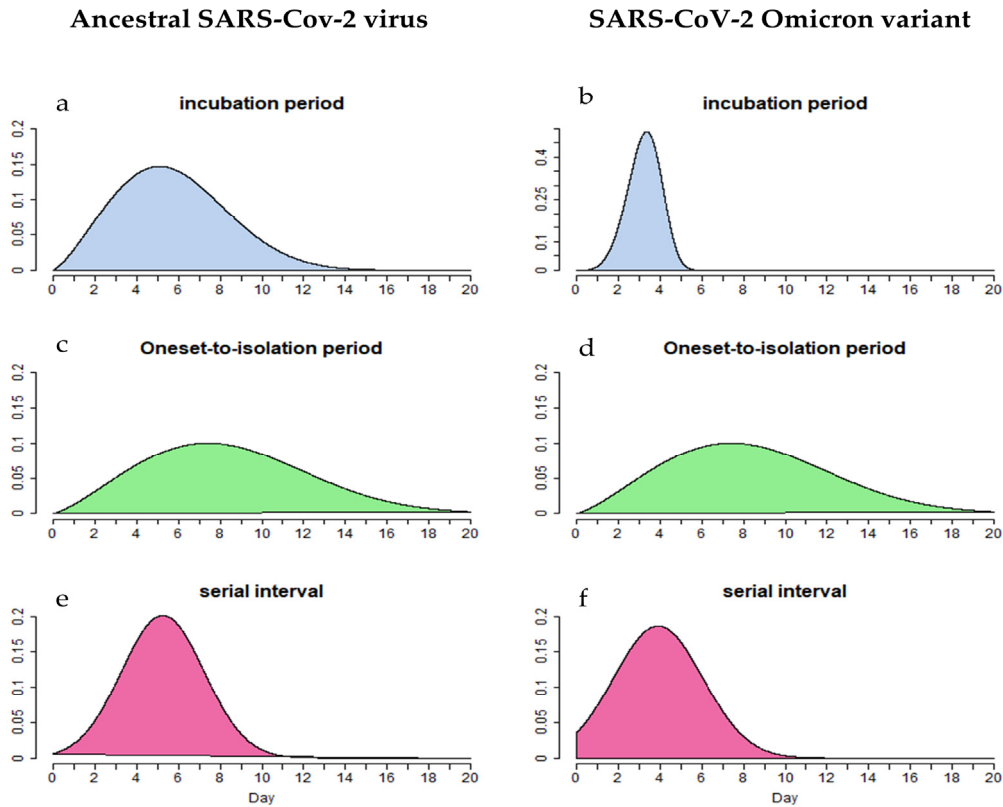

Figure S1. Incubation period, onset-to-isolation interval, and serial interval distributions during the

**period of the ancestral SARS-Cov-2 virus and SARS-CoV-2 Omicron variant.** (a) The incubation period for the ancestral SARS-Cov-2 virus with a mean of 5.8 days and a standard deviation of 2.6 days; (b) The incubation period for the SARS-CoV-2 Omicron variant with a mean of 3.24 days and a standard deviation of 0.8 days; (c) and (d) The delay from symptom onset to isolation was a Weibull distribution with a mean of 9.76 days and a standard deviation of 7.66 days; (e) and (f) A serial interval for each case was drawn from a skew-normal distribution with mean given by the incubation period of each case. Parameter values and references were as given in Table 1.

### *Negative Binomial*

Note that each secondary case was created only if the infected person had not been isolated by the time of infection. We implemented a branching process model in which the number of secondary cases  $Y$  produced by each primary case is generated from a negative binomial distribution with a mean equal to a reproduction number  $R_0$ . The probability density function is as follows:

$$f(y) = \frac{\Gamma(y+n)}{(\Gamma(n)y!)} p^n (1-p)^y$$

We adjusted this distribution with mean  $= n(1-p)/p$  equals to the reproduction number  $R_0$ .

For each primary case, we used the negative binomial distribution to calculate the number of secondary cases produced. Then, for each secondary case, we calculated the estimated transmission date using the exposure date of the primary case, and a serial interval was generated from the skew normal distribution described below.

### *Serial Interval*

Each new infection was assigned a serial interval  $S$  (time between successive cases in the transmission chain of infection) drawn from a skew-normal distribution. The corresponding probability density function is as follows:

$$f(s) = \frac{2}{\omega} \phi\left(\frac{s-\xi}{\omega}\right) \Phi\left(\alpha\left(\frac{s-\xi}{\omega}\right)\right)$$

In this function,  $\phi$  is the standard normal probability density function, and  $\Phi$  is the corresponding cumulative distribution function.

We adjusted the function with the location parameter  $\xi$ , which is drawn from the incubation period of the specific case. The scale parameter  $\omega$  is assumed to be 2, and a shape parameter  $\alpha$  is adjusted based on pre-symptomatic transmission [2]. We assumed that pre-symptomatic transmission to be 55%. The distribution is shown in Figure S1(e)

and (f).

Figure S2 demonstrated the five possible transmission outcomes from the same primary source A with different intervention procedures. Contact tracing was conducted towards cases B and F, with an 80% success rate. Symptomatic screening was applied to cases C and E. Universal testing was applied to case D. The parameter values were as given in Table 1.

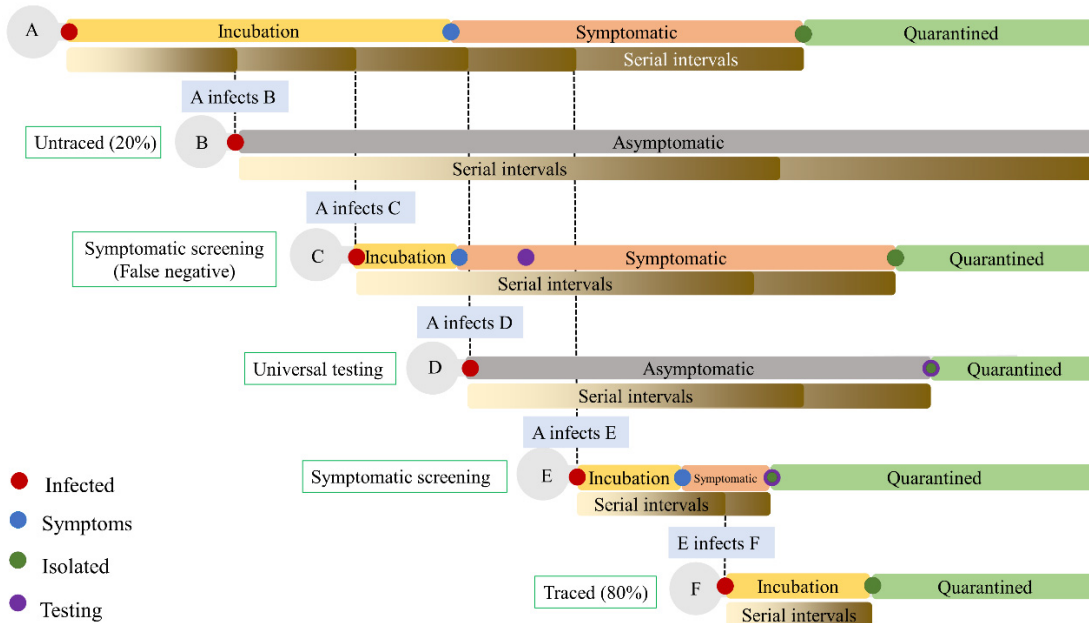

**Figure S2. Five possible transmission outcomes.** An example of the simulated process starting with individual A as the initial infector. Before being quarantined, individual A had the potential of infecting others during the incubation period and the delay from onset to isolation, which were both drawn using the serial interval distribution. For each of the exposed individuals, a serial interval was drawn before each case's isolation. In this example, we assume that an infected individual could be contact traced with a success rate of 80%, detected after symptomatic screening or identified by universal testing. Before isolation, each infected individual could become a secondary infector.

### Subclinical cases

For each new secondary patient, we independently determined the occurrence of a subclinical case with a probability of 0.4. Note that a subclinical case would not be isolated without intervention.

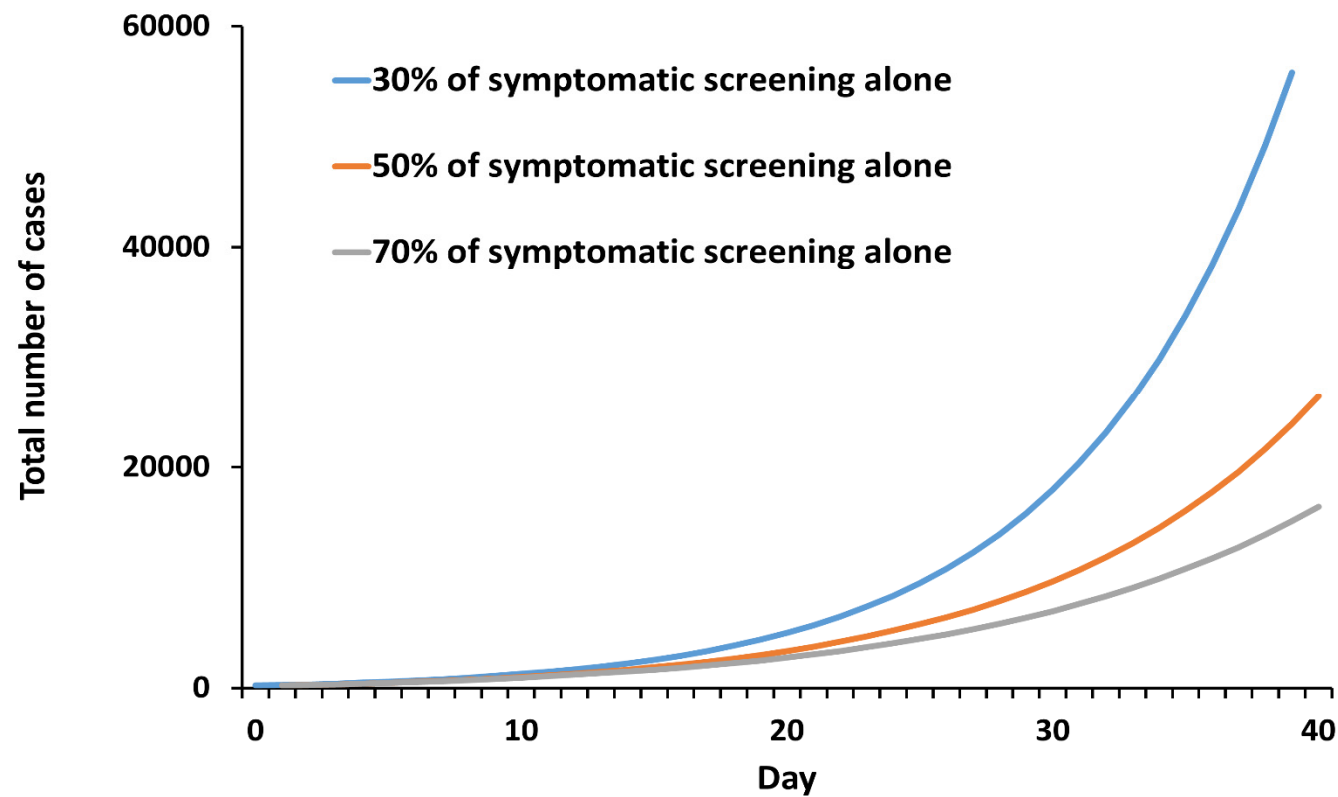

**Figure S3. Simulated total number of cases under symptomatic screening alone.** This figure shows that 30%, 50%, and 70% of symptomatic screening alone led to an 83.3%, 92.0%, and 94.9% case reduction, respectively, compared to the Reference in a high prevalence country.

| a.              |               |                       |     |     |     |    |    |    |
|-----------------|---------------|-----------------------|-----|-----|-----|----|----|----|
| Contact tracing | Initial cases | Universal testing (%) |     |     |     |    |    |    |
|                 |               | 0                     | 0.5 | 0.6 | 0.7 | 1  | 5  | 10 |
| 0%              | 70            | -                     | -   | -   | -   | -  | -  | -  |
|                 | 60            | -                     | -   | -   | -   | -  | -  | -  |
|                 | 50            | -                     | -   | -   | -   | -  | -  | -  |
|                 | 40            | -                     | -   | -   | -   | -  | -  | -  |
|                 | 30            | -                     | -   | -   | -   | -  | -  | -  |
|                 | 20            | -                     | -   | -   | -   | -  | -  | -  |
|                 | 10            | -                     | -   | -   | -   | -  | -  | -  |
| 40%             | 70            | -                     | -   | -   | -   | -  | -  | 34 |
|                 | 60            | -                     | -   | -   | -   | -  | -  | 32 |
|                 | 50            | -                     | -   | -   | -   | -  | -  | 32 |
|                 | 40            | -                     | -   | -   | -   | -  | -  | 30 |
|                 | 30            | -                     | -   | -   | -   | -  | -  | 28 |
|                 | 20            | -                     | -   | -   | -   | -  | 37 | 22 |
|                 | 10            | -                     | -   | -   | -   | -  | 28 | 19 |
| 80%             | 70            | -                     | -   | -   | 40  | 39 | 26 | 21 |
|                 | 60            | -                     | 39  | 38  | 39  | 38 | 25 | 21 |
|                 | 50            | -                     | 36  | 39  | 36  | 37 | 24 | 19 |
|                 | 40            | 37                    | 37  | 34  | 37  | 31 | 23 | 19 |
|                 | 30            | 35                    | 35  | 35  | 31  | 30 | 21 | 18 |
|                 | 20            | 32                    | 30  | 28  | 26  | 27 | 20 | 17 |
|                 | 10            | 23                    | 24  | 23  | 21  | 22 | 17 | 15 |

| b.              |               |                       |     |     |     |    |    |    |
|-----------------|---------------|-----------------------|-----|-----|-----|----|----|----|
| Contact tracing | Initial cases | Universal testing (%) |     |     |     |    |    |    |
|                 |               | 0                     | 0.5 | 0.6 | 0.7 | 1  | 5  | 10 |
| 0%              | 70            | -                     | -   | -   | -   | -  | -  | -  |
|                 | 60            | -                     | -   | -   | -   | -  | -  | -  |
|                 | 50            | -                     | -   | -   | -   | -  | -  | -  |
|                 | 40            | -                     | -   | -   | -   | -  | -  | -  |
|                 | 30            | -                     | -   | -   | -   | -  | -  | -  |
|                 | 20            | -                     | -   | -   | -   | -  | -  | -  |
|                 | 10            | -                     | -   | -   | -   | -  | -  | -  |
| 40%             | 70            | -                     | -   | -   | -   | -  | 21 | 15 |
|                 | 60            | -                     | -   | -   | -   | -  | 19 | 14 |
|                 | 50            | -                     | -   | -   | -   | -  | 16 | 7  |
|                 | 40            | -                     | -   | -   | -   | -  | 7  | 7  |
|                 | 30            | -                     | -   | -   | -   | 19 | 7  | 7  |
|                 | 20            | -                     | 7   | 7   | 7   | 7  | 7  | 7  |
|                 | 10            | 7                     | 7   | 7   | 7   | 7  | 7  | 7  |
| 80%             | 70            | 21                    | 19  | 20  | 19  | 18 | 15 | 12 |
|                 | 60            | 19                    | 19  | 18  | 18  | 16 | 14 | 12 |
|                 | 50            | 7                     | 7   | 7   | 7   | 7  | 7  | 7  |
|                 | 40            | 7                     | 7   | 7   | 7   | 7  | 7  | 7  |
|                 | 30            | 7                     | 7   | 7   | 7   | 7  | 7  | 7  |
|                 | 20            | 7                     | 7   | 7   | 7   | 7  | 7  | 7  |
|                 | 10            | 7                     | 7   | 7   | 7   | 7  | 7  | 7  |

-: The epidemic is not controlled at any time.

**Figure S4. Time to outbreak control with 70% symptomatic screening.** This figure shows time to outbreak control for the simulated COVID-19 pandemic with 0%, 40%, and 80% contact tracing and 70% symptomatic screening. We show the earliest day to achieve outbreak control based on (a) the strict definition and (b) the light definition.

| a.              |               |                       |     |     |     |    |    |    | b.              |               |                       |     |     |     |    |    |    |
|-----------------|---------------|-----------------------|-----|-----|-----|----|----|----|-----------------|---------------|-----------------------|-----|-----|-----|----|----|----|
| Contact tracing | Initial cases | Universal testing (%) |     |     |     |    |    |    | Contact tracing | Initial cases | Universal testing (%) |     |     |     |    |    |    |
|                 |               | 0                     | 0.5 | 0.6 | 0.7 | 1  | 5  | 10 |                 |               | 0                     | 0.5 | 0.6 | 0.7 | 1  | 5  | 10 |
| 0%              | 70            | -                     | -   | -   | -   | -  | -  | -  | 0%              | 70            | -                     | -   | -   | -   | -  | -  | -  |
|                 | 60            | -                     | -   | -   | -   | -  | -  | -  |                 | 60            | -                     | -   | -   | -   | -  | -  | -  |
|                 | 50            | -                     | -   | -   | -   | -  | -  | -  |                 | 50            | -                     | -   | -   | -   | -  | -  | -  |
|                 | 40            | -                     | -   | -   | -   | -  | -  | -  |                 | 40            | -                     | -   | -   | -   | -  | -  | -  |
|                 | 30            | -                     | -   | -   | -   | -  | -  | -  |                 | 30            | -                     | -   | -   | -   | -  | -  | -  |
|                 | 20            | -                     | -   | -   | -   | -  | -  | -  |                 | 20            | -                     | -   | -   | -   | -  | -  | -  |
|                 | 10            | -                     | -   | -   | -   | -  | -  | -  |                 | 10            | -                     | -   | -   | -   | -  | -  | -  |
| 40%             | 70            | -                     | -   | -   | -   | -  | -  | 35 | 40%             | 70            | -                     | -   | -   | -   | -  | 25 | 16 |
|                 | 60            | -                     | -   | -   | -   | -  | -  | 35 |                 | 60            | -                     | -   | -   | -   | -  | 22 | 15 |
|                 | 50            | -                     | -   | -   | -   | -  | -  | 37 |                 | 50            | -                     | -   | -   | -   | -  | 17 | 12 |
|                 | 40            | -                     | -   | -   | -   | -  | -  | 32 |                 | 40            | -                     | -   | -   | -   | -  | 16 | 7  |
|                 | 30            | -                     | -   | -   | -   | -  | -  | 30 |                 | 30            | -                     | -   | -   | -   | -  | 7  | 7  |
|                 | 20            | -                     | -   | -   | -   | -  | -  | 25 |                 | 20            | -                     | -   | -   | -   | -  | 7  | 7  |
|                 | 10            | -                     | -   | -   | -   | -  | 33 | 19 |                 | 10            | -                     | 7   | 7   | 7   | 7  | 7  | 7  |
| 80%             | 70            | -                     | -   | -   | -   | -  | 25 | 22 | 80%             | 70            | 26                    | 24  | 23  | 22  | 21 | 15 | 13 |
|                 | 60            | -                     | -   | -   | -   | -  | 25 | 22 |                 | 60            | 24                    | 21  | 21  | 21  | 19 | 14 | 12 |
|                 | 50            | -                     | -   | -   | -   | -  | 26 | 20 |                 | 50            | 22                    | 19  | 19  | 18  | 17 | 13 | 7  |
|                 | 40            | -                     | -   | -   | -   | 40 | 23 | 19 |                 | 40            | 17                    | 16  | 17  | 15  | 16 | 7  | 7  |
|                 | 30            | -                     | 40  | 40  | -   | 34 | 23 | 18 |                 | 30            | 7                     | 7   | 7   | 7   | 7  | 7  | 7  |
|                 | 20            | 40                    | 36  | 34  | 38  | 32 | 20 | 17 |                 | 20            | 7                     | 7   | 7   | 7   | 7  | 7  | 7  |
|                 | 10            | 33                    | 26  | 26  | 25  | 25 | 16 | 16 |                 | 10            | 7                     | 7   | 7   | 7   | 7  | 7  | 7  |

-: The epidemic is not controlled at any time.

**Figure S5. Time to outbreak control with 50% symptomatic screening.** This figure shows time to outbreak control for the simulated COVID-19 pandemic with 0%, 40%, and 80% contact tracing and 50% symptomatic screening. We show the earliest day to achieve outbreak control based on (a) the strict definition and (b) the light definition.

| a.              |               | Universal testing (%) |     |     |     |    |    |    |  |
|-----------------|---------------|-----------------------|-----|-----|-----|----|----|----|--|
| Contact tracing | Initial cases | 0                     | 0.5 | 0.6 | 0.7 | 1  | 5  | 10 |  |
| 0%              | 70            | -                     | -   | -   | -   | -  | -  | -  |  |
|                 | 60            | -                     | -   | -   | -   | -  | -  | -  |  |
|                 | 50            | -                     | -   | -   | -   | -  | -  | -  |  |
|                 | 40            | -                     | -   | -   | -   | -  | -  | -  |  |
|                 | 30            | -                     | -   | -   | -   | -  | -  | -  |  |
|                 | 20            | -                     | -   | -   | -   | -  | -  | -  |  |
|                 | 10            | -                     | -   | -   | -   | -  | -  | -  |  |
| 40%             | 70            | -                     | -   | -   | -   | -  | -  | 39 |  |
|                 | 60            | -                     | -   | -   | -   | -  | -  | 38 |  |
|                 | 50            | -                     | -   | -   | -   | -  | -  | 35 |  |
|                 | 40            | -                     | -   | -   | -   | -  | -  | 34 |  |
|                 | 30            | -                     | -   | -   | -   | -  | -  | 33 |  |
|                 | 20            | -                     | -   | -   | -   | -  | -  | 29 |  |
|                 | 10            | -                     | -   | -   | -   | -  | -  | 22 |  |
| 80%             | 70            | -                     | -   | -   | -   | -  | 30 | 23 |  |
|                 | 60            | -                     | -   | -   | -   | -  | 29 | 22 |  |
|                 | 50            | -                     | -   | -   | -   | -  | 28 | 22 |  |
|                 | 40            | -                     | -   | -   | -   | -  | 27 | 20 |  |
|                 | 30            | -                     | -   | -   | -   | -  | 26 | 21 |  |
|                 | 20            | -                     | -   | -   | -   | -  | 23 | 17 |  |
|                 | 10            | -                     | -   | -   | 40  | 34 | 18 | 15 |  |

| b.              |               | Universal testing (%) |     |     |     |    |    |    |  |
|-----------------|---------------|-----------------------|-----|-----|-----|----|----|----|--|
| Contact tracing | Initial cases | 0                     | 0.5 | 0.6 | 0.7 | 1  | 5  | 10 |  |
| 0%              | 70            | -                     | -   | -   | -   | -  | -  | -  |  |
|                 | 60            | -                     | -   | -   | -   | -  | -  | -  |  |
|                 | 50            | -                     | -   | -   | -   | -  | -  | -  |  |
|                 | 40            | -                     | -   | -   | -   | -  | -  | -  |  |
|                 | 30            | -                     | -   | -   | -   | -  | -  | -  |  |
|                 | 20            | -                     | -   | -   | -   | -  | -  | -  |  |
|                 | 10            | -                     | -   | -   | -   | -  | -  | -  |  |
| 40%             | 70            | -                     | -   | -   | -   | -  | 36 | 16 |  |
|                 | 60            | -                     | -   | -   | -   | -  | 33 | 16 |  |
|                 | 50            | -                     | -   | -   | -   | -  | 27 | 14 |  |
|                 | 40            | -                     | -   | -   | -   | -  | 18 | 7  |  |
|                 | 30            | -                     | -   | -   | -   | -  | 7  | 7  |  |
|                 | 20            | -                     | -   | -   | -   | -  | 7  | 7  |  |
|                 | 10            | -                     | -   | -   | -   | -  | 7  | 7  |  |
| 80%             | 70            | -                     | 39  | 36  | 37  | 29 | 16 | 13 |  |
|                 | 60            | -                     | 36  | 33  | 32  | 28 | 16 | 12 |  |
|                 | 50            | -                     | 28  | 27  | 26  | 22 | 14 | 7  |  |
|                 | 40            | 40                    | 23  | 25  | 22  | 22 | 7  | 7  |  |
|                 | 30            | 23                    | 18  | 19  | 15  | 17 | 7  | 7  |  |
|                 | 20            | 7                     | 7   | 7   | 7   | 7  | 7  | 7  |  |
|                 | 10            | 7                     | 7   | 7   | 7   | 7  | 7  | 7  |  |

-: The epidemic is not controlled at any time.

**Figure S6. Time to outbreak control with 30% symptomatic screening.** This figure shows time to outbreak control for the simulated COVID-19 pandemic with 0%, 40%, and 80% contact tracing and 30% symptomatic screening. We show the earliest day to achieve outbreak control based on (a) the strict definition and (b) the light definition.



**Table S1.** Daily increase of COVID-19 cases during the simulated days 1-40 in a low prevalence country (initial case number = 20).

| Day | Strategy I         |                     |                     | Strategy II                                |                                             |                                             | Strategy III                                                        |                                                                      |                                                                      |
|-----|--------------------|---------------------|---------------------|--------------------------------------------|---------------------------------------------|---------------------------------------------|---------------------------------------------------------------------|----------------------------------------------------------------------|----------------------------------------------------------------------|
|     | Contact tracing 0% | Contact tracing 40% | Contact tracing 80% | Contact tracing 0% + symptomatic screening | Contact tracing 40% + symptomatic screening | Contact tracing 80% + symptomatic screening | Contact tracing 0% + symptomatic screening + universal testing 0.5% | Contact tracing 40% + symptomatic screening + universal testing 0.5% | Contact tracing 80% + symptomatic screening + universal testing 0.5% |
|     |                    |                     |                     |                                            |                                             |                                             |                                                                     |                                                                      |                                                                      |
|     |                    |                     |                     |                                            |                                             |                                             |                                                                     |                                                                      |                                                                      |
| 1   | 3.49               | 3.57                | 3.537               | 3.33                                       | 3.519                                       | 3.461                                       | 3.14                                                                | 3.488                                                                | 3.48                                                                 |
| 2   | 4.110              | 4.259               | 4.202               | 3.61                                       | 3.371                                       | 3.159                                       | 3.12                                                                | 3.332                                                                | 3.194                                                                |
| 3   | 6.600              | 6.359               | 6.149               | 3.91                                       | 4.021                                       | 3.856                                       | 4.46                                                                | 4.081                                                                | 3.752                                                                |
| 4   | 8.670              | 8.604               | 8.384               | 4.98                                       | 4.844                                       | 4.317                                       | 5                                                                   | 4.837                                                                | 4.251                                                                |
| 5   | 11.400             | 11.122              | 10.915              | 6.18                                       | 5.473                                       | 4.524                                       | 6.14                                                                | 5.467                                                                | 4.603                                                                |
| 6   | 13.930             | 13.899              | 13.554              | 6.71                                       | 5.948                                       | 4.59                                        | 6.97                                                                | 5.726                                                                | 4.686                                                                |
| 7   | 16.780             | 16.486              | 16.104              | 7.14                                       | 6.111                                       | 4.439                                       | 7.91                                                                | 6.135                                                                | 4.519                                                                |
| 8   | 19.780             | 19.246              | 18.817              | 7.4                                        | 6.36                                        | 4.224                                       | 7.81                                                                | 6.088                                                                | 4.22                                                                 |
| 9   | 23.740             | 22.581              | 21.604              | 8.19                                       | 6.201                                       | 3.821                                       | 8.36                                                                | 6.077                                                                | 3.762                                                                |
| 10  | 28.210             | 26.670              | 24.688              | 8.73                                       | 6.022                                       | 3.462                                       | 9.03                                                                | 5.921                                                                | 3.411                                                                |

|    |          |         |         |       |       |       |       |       |       |
|----|----------|---------|---------|-------|-------|-------|-------|-------|-------|
| 11 | 33.610   | 30.669  | 28.304  | 10.1  | 6.01  | 3.084 | 9.54  | 5.872 | 2.854 |
| 12 | 39.900   | 36.636  | 31.515  | 9.84  | 5.849 | 2.678 | 9.79  | 6.018 | 2.529 |
| 13 | 46.550   | 42.452  | 36.006  | 10.55 | 5.949 | 2.425 | 10.48 | 5.752 | 2.322 |
| 14 | 54.910   | 49.722  | 39.645  | 10.99 | 5.793 | 2.18  | 11.43 | 5.786 | 2.062 |
| 15 | 65.000   | 58.603  | 44.495  | 12.59 | 5.806 | 1.823 | 11.9  | 5.768 | 1.769 |
| 16 | 78.630   | 68.035  | 49.837  | 13.45 | 5.76  | 1.681 | 12.58 | 5.838 | 1.623 |
| 17 | 95.030   | 79.878  | 56.000  | 14.43 | 5.793 | 1.446 | 13.73 | 5.676 | 1.396 |
| 18 | 111.830  | 92.928  | 62.546  | 14.72 | 5.696 | 1.315 | 14.67 | 5.754 | 1.249 |
| 19 | 131.960  | 108.435 | 70.017  | 15.82 | 5.684 | 1.134 | 15.47 | 5.637 | 1.185 |
| 20 | 159.050  | 126.826 | 78.480  | 17.67 | 5.523 | 1.083 | 15.71 | 5.651 | 1.004 |
| 21 | 189.470  | 148.609 | 88.639  | 18.81 | 5.552 | 0.925 | 16.83 | 5.459 | 0.938 |
| 22 | 229.590  | 173.290 | 99.045  | 20.13 | 5.471 | 0.842 | 17.95 | 5.598 | 0.914 |
| 23 | 271.630  | 201.954 | 111.796 | 20.92 | 5.653 | 0.754 | 19.64 | 5.413 | 0.799 |
| 24 | 321.370  | 236.490 | 125.150 | 22.87 | 5.593 | 0.654 | 19.31 | 5.473 | 0.686 |
| 25 | 381.550  | 276.791 | 140.952 | 24.36 | 5.575 | 0.585 | 20.63 | 5.444 | 0.632 |
| 26 | 456.860  | 322.609 | 159.408 | 25.41 | 5.64  | 0.536 | 22.39 | 5.459 | 0.506 |
| 27 | 543.750  | 377.934 | 179.552 | 26.53 | 5.63  | 0.451 | 24.26 | 5.198 | 0.454 |
| 28 | 647.870  | 440.458 | 199.810 | 29.55 | 5.549 | 0.428 | 25.07 | 5.36  | 0.452 |
| 29 | 773.520  | 514.422 | 224.744 | 30.53 | 5.621 | 0.42  | 26.69 | 5.277 | 0.448 |
| 30 | 922.880  | 602.978 | 251.679 | 33.51 | 5.435 | 0.313 | 29.76 | 5.183 | 0.37  |
| 31 | 1096.110 | 704.574 | 283.064 | 34.37 | 5.501 | 0.292 | 30.86 | 5.207 | 0.343 |
| 32 | 1304.590 | 825.268 | 318.315 | 36.44 | 5.425 | 0.232 | 31.8  | 5.09  | 0.305 |
| 33 | 1551.260 | 961.319 | 356.528 | 39.84 | 5.412 | 0.241 | 33.74 | 5.017 | 0.223 |

|    |          |          |         |       |       |       |       |       |       |
|----|----------|----------|---------|-------|-------|-------|-------|-------|-------|
| 34 | 1846.070 | 1125.413 | 400.521 | 40.07 | 5.488 | 0.191 | 36    | 5.008 | 0.252 |
| 35 | 2205.540 | 1315.543 | 449.597 | 43.57 | 5.405 | 0.184 | 37.13 | 4.896 | 0.232 |
| 36 | 2623.270 | 1534.797 | 505.062 | 47.3  | 5.271 | 0.156 | 41.33 | 5.02  | 0.158 |
| 37 | 3128.320 | 1794.885 | 567.681 | 49.92 | 5.284 | 0.15  | 43.96 | 4.967 | 0.167 |
| 38 | 3720.780 | 2098.101 | 637.334 | 53.41 | 5.301 | 0.12  | 45.26 | 4.88  | 0.152 |
| 39 | 4431.630 | 2451.633 | 715.001 | 56.92 | 5.016 | 0.123 | 49.27 | 4.891 | 0.1   |
| 40 | 5271.670 | 2865.289 | 802.591 | 60.98 | 5.192 | 0.109 | 51.46 | 4.951 | 0.094 |

Note: Gray areas indicates the days when the daily case number increase is lower than one.

**Table S2.** Daily increase of COVID-19 cases under strategy III's current and projected universal testing capacities in a low prevalence country (initial case number = 20).

| Day | Current universal testing capacities            |                                                |                                              | Projected universal testing capacities       |                                               |
|-----|-------------------------------------------------|------------------------------------------------|----------------------------------------------|----------------------------------------------|-----------------------------------------------|
|     | Contact tracing 80% +                           | Contact tracing 80% +                          | Contact tracing 80% +                        | Contact tracing 80% +                        | Contact tracing 80% +                         |
|     | symptomatic screening + universal testing 0.05% | symptomatic screening + universal testing 0.5% | symptomatic screening + universal testing 1% | symptomatic screening + universal testing 5% | symptomatic screening + universal testing 10% |
| 1   | 3.495                                           | 3.558                                          | 3.506                                        | 3.41                                         | 3.557                                         |
| 2   | 3.385                                           | 3.264                                          | 3.145                                        | 3.03                                         | 3.156                                         |
| 3   | 3.816                                           | 3.739                                          | 3.769                                        | 3.593                                        | 3.553                                         |
| 4   | 4.317                                           | 4.141                                          | 4.25                                         | 3.999                                        | 3.931                                         |
| 5   | 4.759                                           | 4.386                                          | 4.605                                        | 4.196                                        | 4.24                                          |
| 6   | 4.671                                           | 4.591                                          | 4.573                                        | 4.311                                        | 4.006                                         |
| 7   | 4.692                                           | 4.499                                          | 4.336                                        | 4.159                                        | 3.826                                         |
| 8   | 4.203                                           | 4.141                                          | 4.035                                        | 3.666                                        | 3.386                                         |
| 9   | 3.741                                           | 3.855                                          | 3.675                                        | 3.201                                        | 2.928                                         |
| 10  | 3.313                                           | 3.393                                          | 3.149                                        | 2.819                                        | 2.424                                         |
| 11  | 2.905                                           | 2.971                                          | 2.8                                          | 2.461                                        | 2.035                                         |
| 12  | 2.688                                           | 2.627                                          | 2.54                                         | 2.157                                        | 1.79                                          |
| 13  | 2.423                                           | 2.39                                           | 2.352                                        | 1.829                                        | 1.476                                         |
| 14  | 2.167                                           | 2.221                                          | 1.92                                         | 1.656                                        | 1.26                                          |
| 15  | 1.838                                           | 1.898                                          | 1.685                                        | 1.437                                        | 1.044                                         |
| 16  | 1.574                                           | 1.64                                           | 1.49                                         | 1.229                                        | 0.837                                         |
| 17  | 1.395                                           | 1.449                                          | 1.311                                        | 1.074                                        | 0.675                                         |

|    |       |       |       |       |       |
|----|-------|-------|-------|-------|-------|
| 18 | 1.284 | 1.284 | 1.158 | 0.903 | 0.644 |
| 19 | 1.214 | 1.16  | 1.076 | 0.798 | 0.524 |
| 20 | 1.167 | 1.003 | 0.895 | 0.653 | 0.432 |
| 21 | 0.958 | 0.979 | 0.868 | 0.607 | 0.389 |
| 22 | 0.814 | 0.813 | 0.847 | 0.516 | 0.344 |
| 23 | 0.741 | 0.733 | 0.687 | 0.419 | 0.282 |
| 24 | 0.693 | 0.608 | 0.596 | 0.331 | 0.243 |
| 25 | 0.615 | 0.579 | 0.525 | 0.303 | 0.216 |
| 26 | 0.607 | 0.472 | 0.477 | 0.265 | 0.173 |
| 27 | 0.501 | 0.401 | 0.425 | 0.225 | 0.129 |
| 28 | 0.406 | 0.371 | 0.403 | 0.204 | 0.129 |
| 29 | 0.38  | 0.34  | 0.335 | 0.168 | 0.101 |
| 30 | 0.372 | 0.299 | 0.326 | 0.147 | 0.094 |
| 31 | 0.283 | 0.283 | 0.303 | 0.132 | 0.077 |
| 32 | 0.253 | 0.271 | 0.247 | 0.119 | 0.044 |
| 33 | 0.216 | 0.208 | 0.229 | 0.108 | 0.049 |
| 34 | 0.27  | 0.203 | 0.22  | 0.102 | 0.025 |
| 35 | 0.214 | 0.141 | 0.203 | 0.095 | 0.027 |
| 36 | 0.201 | 0.14  | 0.185 | 0.06  | 0.024 |
| 37 | 0.17  | 0.139 | 0.16  | 0.066 | 0.021 |
| 38 | 0.184 | 0.118 | 0.136 | 0.06  | 0.021 |
| 39 | 0.158 | 0.105 | 0.108 | 0.034 | 0.016 |
| 40 | 0.157 | 0.105 | 0.093 | 0.047 | 0.023 |

Note: Gray areas indicate the days when the daily case number increase is lower than one.

**Table S3.** Daily increase of COVID-19 cases with contact-tracing at 40% success rate in a low prevalence country (initial case number = 20).

| Day | Contact tracing 40% +<br>symptomatic<br>screening + universal<br>testing 5% | Contact tracing 40% +<br>symptomatic<br>screening + universal<br>testing 10% | Contact tracing 40% +<br>symptomatic<br>screening + universal<br>testing 15% | Contact tracing 40% +<br>symptomatic<br>screening + universal<br>testing 20% |
|-----|-----------------------------------------------------------------------------|------------------------------------------------------------------------------|------------------------------------------------------------------------------|------------------------------------------------------------------------------|
|     |                                                                             |                                                                              |                                                                              |                                                                              |
|     |                                                                             |                                                                              |                                                                              |                                                                              |
| 1   | 3.71                                                                        | 3.77                                                                         | 3.54                                                                         | 3.72                                                                         |
| 2   | 3.16                                                                        | 3.38                                                                         | 2.94                                                                         | 2.82                                                                         |
| 3   | 3.65                                                                        | 3.53                                                                         | 2.92                                                                         | 2.82                                                                         |
| 4   | 4.27                                                                        | 3.58                                                                         | 2.66                                                                         | 2.65                                                                         |
| 5   | 4.65                                                                        | 3.39                                                                         | 3.32                                                                         | 3.01                                                                         |
| 6   | 4.18                                                                        | 3.29                                                                         | 2.82                                                                         | 3.19                                                                         |
| 7   | 4.6                                                                         | 3.51                                                                         | 2.8                                                                          | 2.3                                                                          |
| 8   | 4.46                                                                        | 3.03                                                                         | 2.47                                                                         | 2.32                                                                         |
| 9   | 4.05                                                                        | 2.69                                                                         | 2.04                                                                         | 1.48                                                                         |
| 10  | 3.6                                                                         | 2.5                                                                          | 1.76                                                                         | 1.51                                                                         |
| 11  | 3.38                                                                        | 2.15                                                                         | 1.38                                                                         | 1.23                                                                         |
| 12  | 3.96                                                                        | 1.93                                                                         | 1.33                                                                         | 0.97                                                                         |
| 13  | 3.49                                                                        | 1.42                                                                         | 1.13                                                                         | 0.99                                                                         |
| 14  | 2.97                                                                        | 1.53                                                                         | 0.93                                                                         | 0.65                                                                         |
| 15  | 3.13                                                                        | 1.21                                                                         | 0.97                                                                         | 0.62                                                                         |
| 16  | 3.13                                                                        | 1.05                                                                         | 0.67                                                                         | 0.5                                                                          |
| 17  | 3.04                                                                        | 0.85                                                                         | 0.68                                                                         | 0.59                                                                         |
| 18  | 2.65                                                                        | 0.88                                                                         | 0.64                                                                         | 0.3                                                                          |
| 19  | 2.65                                                                        | 0.65                                                                         | 0.43                                                                         | 0.32                                                                         |
| 20  | 2.54                                                                        | 0.51                                                                         | 0.28                                                                         | 0.2                                                                          |
| 21  | 2.2                                                                         | 0.77                                                                         | 0.37                                                                         | 0.23                                                                         |
| 22  | 2.04                                                                        | 0.51                                                                         | 0.3                                                                          | 0.12                                                                         |
| 23  | 2.07                                                                        | 0.39                                                                         | 0.15                                                                         | 0.14                                                                         |
| 24  | 1.91                                                                        | 0.4                                                                          | 0.18                                                                         | 0.13                                                                         |
| 25  | 1.74                                                                        | 0.47                                                                         | 0.1                                                                          | 0.08                                                                         |
| 26  | 1.79                                                                        | 0.37                                                                         | 0.17                                                                         | 0.12                                                                         |
| 27  | 1.5                                                                         | 0.34                                                                         | 0.18                                                                         | 0.07                                                                         |
| 28  | 1.84                                                                        | 0.28                                                                         | 0.13                                                                         | 0.04                                                                         |

|    |      |      |      |      |
|----|------|------|------|------|
| 29 | 1.61 | 0.3  | 0.04 | 0.03 |
| 30 | 1.3  | 0.21 | 0.09 | 0.05 |
| 31 | 1.35 | 0.25 | 0.08 | 0.03 |
| 32 | 1.11 | 0.13 | 0.12 | 0.03 |
| 33 | 1.27 | 0.15 | 0.06 | 0.02 |
| 34 | 1.18 | 0.21 | 0.08 | 0.03 |
| 35 | 1.11 | 0.15 | 0.06 | 0.06 |
| 36 | 0.92 | 0.1  | 0.03 | 0    |
| 37 | 1.15 | 0.09 | 0.04 | 0.02 |
| 38 | 0.72 | 0.15 | 0.07 | 0    |
| 39 | 0.94 | 0.19 | 0.02 | 0.02 |
| 40 | 1.12 | 0.08 | 0.04 | 0.01 |

Note: Gray areas indicate the days when the daily case number increase is lower than one.

**Table S4.** Daily increase of COVID-19 cases with contact-tracing at 0% success rate in a low prevalence country (initial case number = 20).

| Day | Contact tracing 0% +<br>symptomatic<br>screening + universal<br>testing 5% | Contact tracing 0% +<br>symptomatic<br>screening + universal<br>testing 10% | Contact tracing 0% +<br>symptomatic<br>screening + universal<br>testing 15% | Contact tracing 0% +<br>symptomatic<br>screening + universal<br>testing 20% |
|-----|----------------------------------------------------------------------------|-----------------------------------------------------------------------------|-----------------------------------------------------------------------------|-----------------------------------------------------------------------------|
| 1   | 3.67                                                                       | 3.34                                                                        | 3.41                                                                        | 3.59                                                                        |
| 2   | 3.39                                                                       | 3.12                                                                        | 2.88                                                                        | 2.79                                                                        |
| 3   | 4.22                                                                       | 3.61                                                                        | 3.37                                                                        | 3.16                                                                        |
| 4   | 4.46                                                                       | 3.84                                                                        | 3.63                                                                        | 3.36                                                                        |
| 5   | 5.65                                                                       | 4.27                                                                        | 3.38                                                                        | 3.19                                                                        |
| 6   | 5.73                                                                       | 4.51                                                                        | 4.14                                                                        | 3.63                                                                        |
| 7   | 6.2                                                                        | 4.09                                                                        | 3.36                                                                        | 3.17                                                                        |
| 8   | 6.47                                                                       | 4.1                                                                         | 3.28                                                                        | 3.06                                                                        |
| 9   | 6.63                                                                       | 3.88                                                                        | 3.02                                                                        | 2.95                                                                        |
| 10  | 6.59                                                                       | 4.15                                                                        | 2.83                                                                        | 3.12                                                                        |
| 11  | 6.14                                                                       | 3.74                                                                        | 2.54                                                                        | 2.19                                                                        |
| 12  | 6.5                                                                        | 3.92                                                                        | 2.56                                                                        | 1.95                                                                        |
| 13  | 6.57                                                                       | 3.88                                                                        | 2.34                                                                        | 2.45                                                                        |
| 14  | 6.73                                                                       | 3.48                                                                        | 2.41                                                                        | 2.12                                                                        |
| 15  | 6.56                                                                       | 3.54                                                                        | 2.4                                                                         | 1.88                                                                        |
| 16  | 7.14                                                                       | 3.06                                                                        | 1.98                                                                        | 1.63                                                                        |
| 17  | 6.78                                                                       | 3.13                                                                        | 1.86                                                                        | 1.48                                                                        |
| 18  | 7.13                                                                       | 2.8                                                                         | 1.51                                                                        | 1.57                                                                        |
| 19  | 7.35                                                                       | 3.26                                                                        | 1.72                                                                        | 1.26                                                                        |
| 20  | 6.99                                                                       | 3.04                                                                        | 1.66                                                                        | 1.16                                                                        |
| 21  | 7.21                                                                       | 2.92                                                                        | 1.62                                                                        | 1.31                                                                        |
| 22  | 7.36                                                                       | 2.8                                                                         | 1.45                                                                        | 1.16                                                                        |
| 23  | 7.3                                                                        | 2.55                                                                        | 1.33                                                                        | 1.04                                                                        |
| 24  | 7.32                                                                       | 2.34                                                                        | 1.26                                                                        | 0.88                                                                        |
| 25  | 7.79                                                                       | 2.69                                                                        | 1.32                                                                        | 0.84                                                                        |
| 26  | 8.13                                                                       | 2.65                                                                        | 1.17                                                                        | 0.71                                                                        |



|    |      |      |      |      |
|----|------|------|------|------|
| 27 | 7.56 | 2.67 | 1.02 | 0.8  |
| 28 | 7.74 | 2.57 | 0.93 | 0.66 |
| 29 | 7.71 | 2.58 | 0.88 | 0.59 |
| 30 | 7.75 | 2.87 | 0.92 | 0.55 |
| 31 | 7.96 | 2.46 | 0.8  | 0.4  |
| 32 | 7.46 | 1.99 | 0.8  | 0.38 |
| 33 | 7.97 | 2.27 | 0.69 | 0.46 |
| 34 | 8.21 | 2.34 | 0.58 | 0.34 |
| 35 | 8.41 | 2.31 | 0.7  | 0.35 |
| 36 | 8.23 | 2.04 | 0.61 | 0.32 |
| 37 | 8.16 | 1.91 | 0.44 | 0.36 |
| 38 | 8.98 | 1.96 | 0.63 | 0.21 |
| 39 | 8.71 | 1.81 | 0.48 | 0.28 |
| 40 | 9.21 | 1.79 | 0.57 | 0.26 |

Note: Gray areas indicate the days when the daily case number increase is lower than one.

**Table S5.** Daily increase of COVID-19 cases during the simulated days 1-40 in a high prevalence country (initial case number = 200).

| Day | Strategy I         |                     |                     | Strategy II                                |                                             |                                             | Strategy III                                                       |                                                                     |                                                                     |
|-----|--------------------|---------------------|---------------------|--------------------------------------------|---------------------------------------------|---------------------------------------------|--------------------------------------------------------------------|---------------------------------------------------------------------|---------------------------------------------------------------------|
|     | Contact tracing 0% | Contact tracing 40% | Contact tracing 80% | Contact tracing 0% + symptomatic screening | Contact tracing 40% + symptomatic screening | Contact tracing 80% + symptomatic screening | Contact tracing 0% + symptomatic screening + 0.5 universal testing | Contact tracing 40% + symptomatic screening + 0.5 universal testing | Contact tracing 80% + symptomatic screening + 0.5 universal testing |
|     |                    |                     |                     |                                            |                                             |                                             |                                                                    |                                                                     |                                                                     |
| 1   | 32.8               | 22.4                | 29                  | 29                                         | 29.6                                        | 24                                          | 22.2                                                               | 21.8                                                                | 27.6                                                                |
| 2   | 48.2               | 40.8                | 46.6                | 34                                         | 33.6                                        | 27.2                                        | 31.6                                                               | 34.4                                                                | 34.8                                                                |
| 3   | 61.2               | 64.4                | 62.6                | 40.4                                       | 44.2                                        | 37.4                                        | 40.4                                                               | 41.6                                                                | 37.6                                                                |
| 4   | 94.2               | 86.6                | 89.2                | 48.2                                       | 53                                          | 40.6                                        | 47.4                                                               | 44.8                                                                | 42.8                                                                |
| 5   | 116.6              | 108.8               | 108.4               | 54.6                                       | 54.2                                        | 42.4                                        | 59                                                                 | 53.4                                                                | 48.2                                                                |
| 6   | 147                | 132.2               | 131.4               | 67.8                                       | 64.2                                        | 45.2                                        | 65                                                                 | 50.6                                                                | 48.8                                                                |
| 7   | 176.2              | 162.4               | 151.6               | 73.2                                       | 61.2                                        | 46.6                                        | 76.6                                                               | 54.4                                                                | 47.4                                                                |
| 8   | 209.6              | 195.6               | 177.8               | 65.8                                       | 64.4                                        | 40.2                                        | 74.4                                                               | 60.6                                                                | 42.6                                                                |
| 9   | 259.8              | 222.6               | 225.6               | 84.2                                       | 66.4                                        | 37.2                                        | 77                                                                 | 55.6                                                                | 38.2                                                                |
| 10  | 307.2              | 267.4               | 244.4               | 85.8                                       | 69                                          | 30.4                                        | 81.2                                                               | 54.8                                                                | 30.2                                                                |
| 11  | 364.6              | 307.4               | 278.2               | 93.8                                       | 65.8                                        | 36                                          | 78.6                                                               | 47.4                                                                | 31                                                                  |
| 12  | 428.4              | 354.2               | 321.8               | 101                                        | 64.6                                        | 27.6                                        | 79.8                                                               | 47.8                                                                | 23.6                                                                |
| 13  | 532.6              | 430.2               | 346                 | 96.2                                       | 69.4                                        | 20.2                                        | 91.6                                                               | 56.8                                                                | 25.4                                                                |
| 14  | 646.4              | 500                 | 401.2               | 108.4                                      | 70.8                                        | 18                                          | 95.6                                                               | 59.8                                                                | 22.4                                                                |
| 15  | 756.6              | 580.8               | 446.4               | 110.6                                      | 77.2                                        | 17.2                                        | 97.6                                                               | 51.4                                                                | 18.4                                                                |
| 16  | 886.8              | 683.6               | 486.6               | 130.4                                      | 68.8                                        | 15.6                                        | 101.4                                                              | 52.6                                                                | 14.2                                                                |

|    |         |         |        |       |      |      |       |      |      |
|----|---------|---------|--------|-------|------|------|-------|------|------|
| 17 | 1069    | 812.8   | 574    | 131.6 | 74   | 13   | 106.6 | 43.2 | 12   |
| 18 | 1294.2  | 942     | 624.4  | 138.6 | 67.4 | 13   | 116.8 | 39.2 | 12   |
| 19 | 1563    | 1117.8  | 712.4  | 155.2 | 62   | 9.8  | 130.6 | 44   | 10.4 |
| 20 | 1801.6  | 1290.8  | 808.2  | 168.4 | 59.4 | 6.2  | 131.2 | 45.2 | 8    |
| 21 | 2102.4  | 1509    | 876.8  | 161   | 64.4 | 9.2  | 142   | 48.8 | 4.8  |
| 22 | 2626    | 1779.4  | 1003   | 179   | 68.6 | 10.2 | 134.4 | 53.2 | 7.8  |
| 23 | 3015.4  | 2083    | 1107.2 | 189.8 | 72.8 | 7.8  | 151   | 41.4 | 6    |
| 24 | 3675.2  | 2372.8  | 1236   | 206.6 | 54.4 | 6.8  | 165.4 | 48.6 | 5.8  |
| 25 | 4314.4  | 2844.6  | 1396.4 | 226.8 | 71.8 | 6.6  | 168   | 34.8 | 3.2  |
| 26 | 5159.4  | 3322    | 1553.2 | 223.6 | 64.8 | 7.6  | 187   | 42.4 | 5.6  |
| 27 | 6109.6  | 3793.8  | 1767.4 | 265   | 68.2 | 5.2  | 186.2 | 38.4 | 6    |
| 28 | 7295    | 4524    | 1967.6 | 278.2 | 63.6 | 6    | 198.4 | 39.8 | 4.6  |
| 29 | 8709.6  | 5321.6  | 2212.8 | 294.2 | 70.6 | 3    | 219.8 | 37   | 3    |
| 30 | 10360.6 | 6169.8  | 2445.6 | 300.6 | 71.6 | 2.8  | 218.6 | 31.6 | 2.6  |
| 31 | 12302.2 | 7222.4  | 2757   | 334   | 67.2 | 2.6  | 233.6 | 40.2 | 2.6  |
| 32 | 14759.6 | 8365    | 3039   | 352.2 | 72.4 | 2.4  | 247.4 | 35.6 | 2.4  |
| 33 | 17619.6 | 9865.2  | 3444   | 366.6 | 71.8 | 2.2  | 257.8 | 42.8 | 1.8  |
| 34 | 20983.6 | 11613.8 | 3874.2 | 402   | 64.8 | 2.4  | 277.6 | 44.2 | 1.8  |
| 35 | 25065   | 13466.2 | 4366   | 422   | 62.2 | 3.8  | 296.6 | 38.8 | 1.6  |
| 36 | 29720.2 | 15823   | 4920.2 | 443.6 | 60.2 | 3.4  | 312.2 | 46.2 | 1.6  |
| 37 | 35425.4 | 18510   | 5469.8 | 480.2 | 60.4 | 2.2  | 323   | 46   | 1    |
| 38 | 42200.8 | 21574.4 | 6199   | 506.4 | 67.2 | 0.8  | 329   | 34.4 | 0.8  |
| 39 | 50072   | 25411   | 6976.8 | 550.4 | 66.2 | 0.6  | 338.8 | 35   | 0.4  |

|    |         |         |        |       |      |     |       |      |     |
|----|---------|---------|--------|-------|------|-----|-------|------|-----|
| 40 | 60036.4 | 29634.4 | 7904.2 | 559.8 | 62.4 | 1.8 | 366.6 | 37.8 | 0.4 |
|----|---------|---------|--------|-------|------|-----|-------|------|-----|

Note: Gray areas indicate the days when the daily case number increase is lower than one.

**Table S6.** Daily increase of COVID-19 cases under strategy III's current and projected universal testing capacities in a high prevalence country (initial case number = 200).

| Day | Current Universal Testing Capacity                                          |                                                                            |                                                                          | Projected Universal Testing Capacity                                     |                                                                           |
|-----|-----------------------------------------------------------------------------|----------------------------------------------------------------------------|--------------------------------------------------------------------------|--------------------------------------------------------------------------|---------------------------------------------------------------------------|
|     | Contact tracing 80% +<br>symptomatic screening +<br>universal testing 0.05% | Contact tracing 80% +<br>symptomatic screening +<br>universal testing 0.5% | Contact tracing 80% +<br>symptomatic screening +<br>universal testing 1% | Contact tracing 80% +<br>symptomatic screening +<br>universal testing 5% | Contact tracing 80% +<br>symptomatic screening<br>+ universal testing 10% |
|     |                                                                             |                                                                            |                                                                          |                                                                          |                                                                           |
| 1   | 26.5                                                                        | 25.7                                                                       | 25.1                                                                     | 22.3                                                                     | 27                                                                        |
| 2   | 34.3                                                                        | 31.6                                                                       | 31.5                                                                     | 28.2                                                                     | 29.3                                                                      |
| 3   | 41.2                                                                        | 39.1                                                                       | 45.1                                                                     | 36.1                                                                     | 30                                                                        |
| 4   | 47.9                                                                        | 42.8                                                                       | 43.5                                                                     | 37.4                                                                     | 33.5                                                                      |
| 5   | 50                                                                          | 48.6                                                                       | 47.3                                                                     | 38                                                                       | 30.4                                                                      |
| 6   | 58.6                                                                        | 49.1                                                                       | 51.1                                                                     | 45.1                                                                     | 30.6                                                                      |
| 7   | 55.9                                                                        | 47.9                                                                       | 51.4                                                                     | 38.2                                                                     | 28                                                                        |
| 8   | 57.1                                                                        | 50.3                                                                       | 49.2                                                                     | 32.7                                                                     | 22.9                                                                      |

|    |      |      |      |      |      |
|----|------|------|------|------|------|
| 9  | 57.6 | 50.3 | 49.4 | 28.1 | 15   |
| 10 | 56   | 49.8 | 43.5 | 23.2 | 13.4 |
| 11 | 55.4 | 43.8 | 44.4 | 20.1 | 12   |
| 12 | 57.9 | 46.9 | 38.6 | 15.6 | 5.8  |
| 13 | 59.1 | 45.9 | 40.8 | 13.4 | 4.9  |
| 14 | 62   | 44.7 | 37.8 | 14.5 | 3.6  |
| 15 | 55.3 | 49   | 32.6 | 10   | 2.5  |
| 16 | 57.7 | 38.2 | 35   | 8.1  | 2.3  |
| 17 | 62.1 | 44.5 | 36   | 9    | 1.7  |
| 18 | 60.5 | 41.8 | 32   | 8.9  | 1.8  |
| 19 | 56.4 | 39.1 | 30.7 | 4.9  | 0.9  |
| 20 | 55.9 | 45   | 29.3 | 5.8  | 1.2  |
| 21 | 57.6 | 42.9 | 29.5 | 3.3  | 0.8  |
| 22 | 55.6 | 38.4 | 28.4 | 3.5  | 0.9  |
| 23 | 52.4 | 39.9 | 26.1 | 3.8  | 0.8  |
| 24 | 49.1 | 34.7 | 26.5 | 2.3  | 0.2  |
| 25 | 53.7 | 38.6 | 21.9 | 1.8  | 0.3  |
| 26 | 56.7 | 34.7 | 23.3 | 1.9  | 0.2  |
| 27 | 56.1 | 36.3 | 22.2 | 1.8  | 0.3  |
| 28 | 53.2 | 36.3 | 21.5 | 1.6  | 0.5  |
| 29 | 51.5 | 38.4 | 21.9 | 0.6  | 0    |
| 30 | 50.5 | 35.9 | 21.3 | 0.8  | 0    |
| 31 | 50.9 | 29.4 | 20.1 | 0.3  | 0    |

|    |      |      |      |     |     |
|----|------|------|------|-----|-----|
| 32 | 53.3 | 35.2 | 17.9 | 0.5 | 0   |
| 33 | 50.2 | 32.5 | 19.3 | 0.3 | 0   |
| 34 | 51.8 | 30.6 | 15.9 | 0.2 | 0   |
| 35 | 51.1 | 32   | 16   | 0.3 | 0.1 |
| 36 | 51.1 | 30.5 | 15.6 | 0.3 | 0.1 |
| 37 | 46.3 | 30.3 | 15.5 | 0.1 | 0   |
| 38 | 53.2 | 30.2 | 18.5 | 0.1 | 0   |
| 39 | 48.8 | 26.5 | 14.7 | 0.1 | 0   |
| 40 | 53.1 | 32.6 | 14.1 | 0.3 | 0   |

Note: Gray areas indicate the days when the daily case number increase is lower than one.

**Table S7.** Daily increase of COVID-19 cases with contact-tracing at 40% success rate in a high prevalence country (initial case number = 200).

| Day | Contact tracing 40%+<br>symptomatic<br>screening + universal<br>testing 5% | Contact tracing 40%+<br>symptomatic<br>screening + universal<br>testing 10% | Contact tracing 40%+<br>symptomatic<br>screening + universal<br>testing 15% | Contact tracing 40%+<br>symptomatic<br>screening + universal<br>testing 20% |
|-----|----------------------------------------------------------------------------|-----------------------------------------------------------------------------|-----------------------------------------------------------------------------|-----------------------------------------------------------------------------|
|     |                                                                            |                                                                             |                                                                             |                                                                             |
|     |                                                                            |                                                                             |                                                                             |                                                                             |
| 1   | 25.1                                                                       | 24.4                                                                        | 24.6                                                                        | 23.2                                                                        |
| 2   | 30.4                                                                       | 29                                                                          | 26.1                                                                        | 27.7                                                                        |
| 3   | 35.8                                                                       | 31.7                                                                        | 31.1                                                                        | 29.4                                                                        |
| 4   | 38.3                                                                       | 31.7                                                                        | 30.8                                                                        | 25.9                                                                        |
| 5   | 41.1                                                                       | 35.9                                                                        | 32.4                                                                        | 29.5                                                                        |
| 6   | 45.4                                                                       | 34.4                                                                        | 30.5                                                                        | 25.6                                                                        |
| 7   | 41.9                                                                       | 33.3                                                                        | 27.9                                                                        | 23.4                                                                        |
| 8   | 39.6                                                                       | 31.5                                                                        | 26.6                                                                        | 20.6                                                                        |
| 9   | 39.3                                                                       | 28.4                                                                        | 21.6                                                                        | 19.1                                                                        |
| 10  | 40                                                                         | 26                                                                          | 18.9                                                                        | 12.2                                                                        |
| 11  | 41.6                                                                       | 22.6                                                                        | 16.6                                                                        | 12                                                                          |
| 12  | 39.4                                                                       | 22.8                                                                        | 12                                                                          | 8.5                                                                         |
| 13  | 39.4                                                                       | 22.8                                                                        | 10                                                                          | 9.7                                                                         |
| 14  | 40.8                                                                       | 19.6                                                                        | 11.8                                                                        | 6.3                                                                         |
| 15  | 33.2                                                                       | 16.7                                                                        | 10.1                                                                        | 6.5                                                                         |
| 16  | 35.2                                                                       | 16.1                                                                        | 8.4                                                                         | 5.4                                                                         |
| 17  | 30.2                                                                       | 16.1                                                                        | 7                                                                           | 4.4                                                                         |
| 18  | 35                                                                         | 12.6                                                                        | 5.8                                                                         | 3.6                                                                         |
| 19  | 32.1                                                                       | 12                                                                          | 3.6                                                                         | 2.7                                                                         |
| 20  | 32.1                                                                       | 10.6                                                                        | 4.8                                                                         | 1.7                                                                         |
| 21  | 33.8                                                                       | 10.2                                                                        | 3.6                                                                         | 1.4                                                                         |
| 22  | 26.6                                                                       | 11.6                                                                        | 3.6                                                                         | 2                                                                           |
| 23  | 28.6                                                                       | 9.6                                                                         | 1.8                                                                         | 2.3                                                                         |
| 24  | 28                                                                         | 8.6                                                                         | 2                                                                           | 1.5                                                                         |
| 25  | 24.1                                                                       | 9.4                                                                         | 3.2                                                                         | 0.7                                                                         |
| 26  | 23.4                                                                       | 6                                                                           | 2.3                                                                         | 0.5                                                                         |
| 27  | 24.5                                                                       | 7                                                                           | 1.4                                                                         | 1                                                                           |
| 28  | 23.2                                                                       | 6.6                                                                         | 1.5                                                                         | 0.3                                                                         |
| 29  | 19.2                                                                       | 6.9                                                                         | 0.9                                                                         | 0.6                                                                         |
| 30  | 21.5                                                                       | 4.7                                                                         | 0.8                                                                         | 0.4                                                                         |
| 31  | 20.8                                                                       | 4.2                                                                         | 0.6                                                                         | 0.2                                                                         |

|    |      |     |     |     |
|----|------|-----|-----|-----|
| 32 | 22.1 | 4.5 | 1   | 0.3 |
| 33 | 22.4 | 3.9 | 0.4 | 1   |
| 34 | 20.1 | 4.2 | 0.5 | 0.5 |
| 35 | 19.1 | 4.5 | 0   | 0.8 |
| 36 | 17.1 | 5   | 0.2 | 0.4 |
| 37 | 16.7 | 3.9 | 0.2 | 0.3 |
| 38 | 17.8 | 4   | 0.2 | 0.5 |
| 39 | 17.6 | 2.4 | 0.5 | 0.5 |
| 40 | 17.3 | 2.5 | 0.3 | 0.1 |

Note: Gray areas indicate the days when the daily case number increase is lower than one.

**Table S8.** Daily increase of COVID-19 cases with contact-tracing at 0% success rate in a high prevalence country (initial case number = 200).

| Day | Contact tracing 0% +<br>symptomatic<br>screening + universal<br>testing 5% | Contact tracing 0% +<br>symptomatic<br>screening + universal<br>testing 10% | Contact tracing 0% +<br>symptomatic<br>screening + universal<br>testing 15% | Contact tracing 0% +<br>symptomatic<br>screening + universal<br>testing 20% |
|-----|----------------------------------------------------------------------------|-----------------------------------------------------------------------------|-----------------------------------------------------------------------------|-----------------------------------------------------------------------------|
| 1   | 26.5                                                                       | 25.1                                                                        | 26.9                                                                        | 26.4                                                                        |
| 2   | 33.2                                                                       | 31.4                                                                        | 27.8                                                                        | 30.8                                                                        |
| 3   | 38.3                                                                       | 36.8                                                                        | 32.7                                                                        | 31                                                                          |
| 4   | 45.5                                                                       | 43.9                                                                        | 35.3                                                                        | 31.4                                                                        |
| 5   | 54.2                                                                       | 43.6                                                                        | 39.5                                                                        | 32.3                                                                        |
| 6   | 55.7                                                                       | 42.4                                                                        | 38.4                                                                        | 34.4                                                                        |
| 7   | 61.3                                                                       | 40.3                                                                        | 37.7                                                                        | 30.3                                                                        |
| 8   | 61.6                                                                       | 40                                                                          | 42.5                                                                        | 32.2                                                                        |
| 9   | 57.3                                                                       | 42.6                                                                        | 37                                                                          | 29.5                                                                        |
| 10  | 61.6                                                                       | 40.3                                                                        | 34.2                                                                        | 26.7                                                                        |
| 11  | 61.9                                                                       | 41.4                                                                        | 31.5                                                                        | 23.1                                                                        |
| 12  | 62.3                                                                       | 40.2                                                                        | 28.8                                                                        | 22.8                                                                        |
| 13  | 61.3                                                                       | 39.3                                                                        | 27                                                                          | 24.1                                                                        |
| 14  | 64.9                                                                       | 35.8                                                                        | 28.2                                                                        | 21.6                                                                        |
| 15  | 63.5                                                                       | 38.3                                                                        | 26.4                                                                        | 18.2                                                                        |
| 16  | 59.7                                                                       | 34                                                                          | 23.9                                                                        | 17                                                                          |
| 17  | 64.4                                                                       | 36.8                                                                        | 20.6                                                                        | 15                                                                          |
| 18  | 58.9                                                                       | 32                                                                          | 20.2                                                                        | 16                                                                          |
| 19  | 64.1                                                                       | 35.3                                                                        | 21                                                                          | 12.8                                                                        |
| 20  | 59.5                                                                       | 32.7                                                                        | 20                                                                          | 15.6                                                                        |



|    |      |      |      |      |
|----|------|------|------|------|
| 21 | 63.4 | 30.8 | 20.1 | 13   |
| 22 | 64.5 | 26.9 | 17.9 | 11.1 |
| 23 | 59.8 | 29.1 | 16.4 | 10   |
| 24 | 59.7 | 26.6 | 14   | 9.9  |
| 25 | 64.4 | 27.2 | 15.7 | 9.3  |
| 26 | 66.5 | 26.6 | 14.7 | 8.8  |
| 27 | 71.4 | 28.1 | 12.2 | 8.2  |
| 28 | 64.7 | 22.7 | 11.4 | 7.1  |
| 29 | 68.5 | 24.7 | 11.1 | 7.2  |
| 30 | 70   | 21.1 | 12.1 | 6.7  |
| 31 | 72.9 | 22.3 | 10.9 | 5.4  |
| 32 | 69.5 | 21.3 | 13.1 | 4.4  |
| 33 | 75.5 | 20.3 | 10.3 | 4.4  |
| 34 | 72.3 | 19.6 | 11.2 | 4.9  |
| 35 | 74.9 | 18   | 9.6  | 3.2  |
| 36 | 73.1 | 15.6 | 9.9  | 3.4  |
| 37 | 71.4 | 20.4 | 8.9  | 3.7  |
| 38 | 72.3 | 17.5 | 9    | 3    |
| 39 | 81.3 | 14.1 | 9.2  | 2    |
| 40 | 80.7 | 13.8 | 8.2  | 3.4  |

**Table S9.** Daily increase of COVID-19 cases with contact-tracing at 0%, 40%, and 80% success rate in a low prevalence country during the period of the SARS-CoV-2 Omicron variant (initial case number = 20).

| Day | Contact tracing 0% +<br>symptomatic<br>screening + universal<br>testing 0.5 % | Contact tracing 40% +<br>symptomatic<br>screening + universal<br>testing 0.5% | Contact tracing 80% +<br>symptomatic<br>screening + universal<br>testing 0.5% |
|-----|-------------------------------------------------------------------------------|-------------------------------------------------------------------------------|-------------------------------------------------------------------------------|
|     |                                                                               |                                                                               |                                                                               |
|     |                                                                               |                                                                               |                                                                               |
| 1   | 65.6                                                                          | 68.3                                                                          | 55.1                                                                          |
| 2   | 67.2                                                                          | 53.7                                                                          | 22.6                                                                          |
| 3   | 75.1                                                                          | 42.7                                                                          | 14.7                                                                          |
| 4   | 91                                                                            | 25.2                                                                          | 11.8                                                                          |
| 5   | 107.8                                                                         | 18.2                                                                          | 5.7                                                                           |
| 6   | 113.2                                                                         | 10.7                                                                          | 1.3                                                                           |
| 7   | 111.8                                                                         | 10.3                                                                          | 2.5                                                                           |
| 8   | 117.2                                                                         | 6.8                                                                           | 1                                                                             |

|    |       |     |     |
|----|-------|-----|-----|
| 9  | 109.9 | 4.8 | 0.4 |
| 10 | 121.7 | 5   | 0.2 |
| 11 | 124.1 | 3.1 | 0   |
| 12 | 121.5 | 1.5 | 0   |
| 13 | 135   | 0.8 | 0   |
| 14 | 133.9 | 0.4 | 0   |
| 15 | 140.2 | 0.9 | 0   |
| 16 | 144.7 | 0.1 | 0   |
| 17 | 152   | 0   | 0   |
| 18 | 150.2 | 0.1 | 0   |
| 19 | 156.3 | 0   | 0   |
| 20 | 174   | 0   | 0   |
| 21 | 185.3 | 0   | 0   |
| 22 | 194.9 | 0   | 0   |
| 23 | 205.2 | 0   | 0   |
| 24 | 218   | 0   | 0   |
| 25 | 235.8 | 0   | 0   |
| 26 | 251.1 | 0   | 0   |
| 27 | 264.5 | 0   | 0   |
| 28 | 287.2 | 0   | 0   |
| 29 | 311.7 | 0   | 0   |
| 30 | 316   | 0   | 0   |
| 31 | 333.4 | 0   | 0   |
| 32 | 346.7 | 0   | 0   |
| 33 | 352.9 | 0   | 0   |
| 34 | 351.8 | 0   | 0   |
| 35 | 374.8 | 0   | 0   |
| 36 | 387.3 | 0   | 0   |
| 37 | 410.6 | 0   | 0   |
| 38 | 447.5 | 0   | 0   |
| 39 | 448.6 | 0   | 0   |
| 40 | 490.2 | 0   | 0   |

Note: Gray areas indicate the days when the daily case number increase is lower than one.

## References

1. Liu, T.; Hu, J.; Kang, M.; Rong, Z.; Lin, L.; Zhong, H.; Huang, Q.; Deng, A.; Huang, Q.; Deng, A.; et al. Time-varying transmission dynamics of Novel Coronavirus Pneumonia in China. *BioRxiv* **2020**. <https://doi.org/10.1101/2020.01.25.919787>.
2. Tsou, H.H.; Cheng, Y.C.; Yuan, H.Y.; Hsu, Y.T.; Wu, H.Y.; Lee, F.J.; Hsiung, C.A.; Chen, W.J.; Sytwu, H.K.; Wu, S.I.; et al. The effect of preventing subclinical transmission on the containment of COVID-19: Mathematical modeling and experience in Taiwan. *Contemp. Clin. Trials* **2020**, *96*, 106101.
